# Supplementary material for: Pre-industrial Temperature Variability on the Swiss Plateau Derived from the Instrumental Daily Series of Bern and Zurich
Source: Copernicus journal article supplement (doi:10.5194/cp-2022-34), 2022-04-27
Supplement: Supplementary file 1 [file Reference_series.pdf › Reference_series.pdf]

| Name                 | Period    | Reference                                      | Used for     |
|----------------------|-----------|------------------------------------------------|--------------|
| Aarau (Bronner)      | 1826-1830 | Brugnara et al. (2020); Faden et al. (2020)    | Bern, Zurich |
| Aarau (Zschogge)     | 1807-1865 | Brugnara et al. (2020); Faden et al. (2020)    | Bern, Zurich |
| Avully               | 1778-1786 | Brugnara et al. (2022)                         | Bern         |
| Basel (d'Annone)     | 1755-1804 | Brönnimann and Brugnara (2020)                 | Bern, Zurich |
| Basel (Huber)        | 1789-1829 | Brugnara and Brönnimann (2022)                 | Bern, Zurich |
| Basel (Merian)       | 1828-1867 | Brönnimann and Brugnara (2021)                 | Bern, Zurich |
| Basel (Socin)        | 1783-1796 | Brönnimann et al. (2022)                       | Bern, Zurich |
| Basel (Wolleb)       | 1777-1785 | Brönnimann et al. (2022)                       | Bern, Zurich |
| Beatenberg           | 1860-1863 | Brugnara et al. (2020)                         | Bern         |
| Chur (Buol)          | 1860-1865 | Brugnara et al. (2020)                         | Zurich       |
| Chur (Herold)        | 1849-1857 | Brugnara et al. (2020)                         | Zurich       |
| Delémont             | 1801-1832 | Brugnara et al. (2020)                         | Bern, Zurich |
| Ellikon              | 1831-1840 | Brugnara et al. (2020)                         | Zurich       |
| Fontaines            | 1843-1862 | Brugnara et al. (2020)                         | Bern         |
| Fribourg             | 1829-1836 | Brugnara et al. (2020)                         | Bern         |
| Gais                 | 1861-1865 | Brugnara et al. (2020)                         | Zurich       |
| Geneva               | 1798-1863 | Brönnimann et al. (2020)                       | Bern, Zurich |
| Geneva (Deluc)       | 1768-1800 | Brugnara et al. (2022)                         | Bern         |
| Geneva (Maurice)     | 1787-1791 | Häderli et al. (2020)                          | Bern         |
| Geneva (Senebier)    | 1782-1789 | Häderli et al. (2020)                          | Bern         |
| Genthod              | 1789-1798 | Brugnara et al. (2022)                         | Bern         |
| Gotthard             | 1781-1792 | Brugnara et al. (2020)                         | Bern, Zurich |
| Gottstatt            | 1841-1847 | Brugnara et al. (2020)                         | Bern         |
| Herisau (Merz)       | 1821-1831 | Brugnara et al. (2020); Weber et al. (2020)    | Bern, Zurich |
| Herisau (Nef)        | 1822-1844 | Brugnara et al. (2020); Weber et al. (2020)    | Bern, Zurich |
| Luzern (Ineichen)    | 1826-1832 | Brugnara et al. (2020)                         | Bern, Zurich |
| Morges               | 1849-1854 | Brugnara et al. (2020)                         | Bern         |
| Mulhouse             | 1800-1824 | Brugnara and Brönnimann (2022)                 | Bern, Zurich |
| Neuchâtel            | 1754-1782 | Brugnara et al. (2020)                         | Bern, Zurich |
| Nufenen              | 1834-1846 | Brugnara et al. (2020)                         | Zurich       |
| Saanen               | 1860-1862 | Brugnara et al. (2020)                         | Bern         |
| Schaffhausen         | 1794-1845 | Brugnara et al. (2020)                         | Bern, Zurich |
| Solothurn            | 1826-1831 | Brugnara et al. (2020)                         | Bern, Zurich |
| St. Gallen           | 1813-1853 | Brugnara et al. (2020); Hürzeler et al. (2020) | Bern, Zurich |
| Tegerfelden          | 1843-1853 | Brugnara et al. (2020)                         | Zurich       |
| Uetliberg            | 1841-1863 | Brugnara et al. (2020)                         | Bern, Zurich |
| Vevey                | 1805-1840 | Brugnara et al. (2020)                         | Bern         |
| Waldenburg           | 1776-1790 | Brönnimann et al. (2022)                       | Bern, Zurich |
| Weissenstein         | 1828-1831 | Brugnara et al. (2020)                         | Bern, Zurich |
| Winterthur (Unknown) | 1808-1816 | Brugnara et al. (2020)                         | Zurich       |
| Zug                  | 1843-1873 | Brugnara et al. (2020)                         | Bern, Zurich |

## References

Brönnimann, S. and Y. Brugnara (2020) D'Annone's Meteorological Series from Basel, 1755–1804. In: Brönnimann, S. (Ed.) Swiss Early Instrumental Meteorological Series. *Geographica Bernensia*, G96, 119–126, <https://doi.org/10.4480/GB2020.G96.11>.

Brönnimann, S., M. Bühler, and Y. Brugnara (2020) The Series from Geneva, 1799–1863. In: Brönnimann, S. (Ed.) Swiss Early Instrumental Meteorological Series. *Geographica Bernensia*, G96, 47–59, <https://doi.org/10.4480/GB2020.G96.04>.

Brönnimann, S. and Y. Brugnara (2021) Meteorological Series from Basel, 1825–1863. In: Brönnimann, S. (Ed.) Swiss Early Instrumental Meteorological Series. *Geographica Bernensia*, G96, 127–138, <https://doi.org/10.4480/GB2020.G96.12>.

Brönnimann, S., Y. Brugnara, and L. Pfister (2022) Several little known meteorological series from Basel, 1766–1802. In: Brönnimann, S. (Ed.) Swiss Early Instrumental Meteorological Series. *Geographica Bernensia*, G96, 213–227, <https://doi.org/10.4480/GB2020.G96.17>.

Brugnara, Y., L. Pfister, L. Villiger, C. Rohr, F. A. Isotta, and S. Brönnimann (2020) Early instrumental meteorological observations in Switzerland: 1708–1873. *Earth System Science Data*, 12(2), 1179–1190, <https://doi.org/10.5194/essd-12-1179-2020>.

Brugnara, Y. and S. Brönnimann (2022) Daniel Huber's Meteorological Record from Basel, 1789–1829. In: Brönnimann, S. (Ed.) Swiss Early Instrumental Meteorological Series. *Geographica Bernensia*, G96, 127–138, <https://doi.org/10.4480/GB2020.G96.18>.

Brugnara Y., S. Brönnimann, M. Grenon, J. Baumann, and P. Wyss (2022) Early meteorological series from Geneva, 1760–1798. In: Brönnimann, S. (Ed.) Swiss Early Instrumental Meteorological Series. *Geographica Bernensia*, G96, 237–244, <https://doi.org/10.4480/GB2020.G96.20>.

Faden, M., L. Villiger, Y. Brugnara, and S. Brönnimann (2020) The Meteorological Series from Aarau, 1807–1865. In: Brönnimann, S. (Ed.) Swiss Early Instrumental Meteorological Series. *Geographica Bernensia*, G96, 61–72, <https://doi.org/10.4480/GB2020.G96.05>.

Häderli, S., S. Pfister, L. Villiger, Y. Brugnara, and S. Brönnimann (2020) Two Meteorological Series from Geneva, 1782–1791. In: Brönnimann, S. (Ed.) Swiss Early Instrumental Meteorological Series. *Geographica Bernensia*, G96, 33–46, <https://doi.org/10.4480/GB2020.G96.03>.

Hürzeler A., Y. Brugnara, and S. Brönnimann (2020) The Meteorological Record from St. Gall, 1812–1853. In: Brönnimann, S. (Ed.) Swiss Early Instrumental Meteorological Series. *Geographica Bernensia*, G96, 87–95, <https://doi.org/10.4480/GB2020.G96.07>.

Weber, J., Y. Brugnara, and S. Brönnimann (2020) Two Meteorological Series from Herisau, 1821–1844. In: Brönnimann, S. (Ed.) Swiss Early Instrumental Meteorological Series. *Geographica Bernensia*, G96, 73–85, <https://doi.org/10.4480/GB2020.G96.06>.

Wyer, V., Y. Brugnara, and S. Brönnimann (2021) Meteorological Series from Neuchâtel, Bern and Gurzelen. In: Brönnimann, S. (Ed.) Swiss Early Instrumental Meteorological Series. *Geographica Bernensia*, G96, 169–182, <https://doi.org/10.4480/GB2020.G96.16>.
